# Supplementary material
Source: MDPI journal article supplement (https://www.mdpi.com/2311-7524/9/3/290)
Supplement: s1 [file s1]

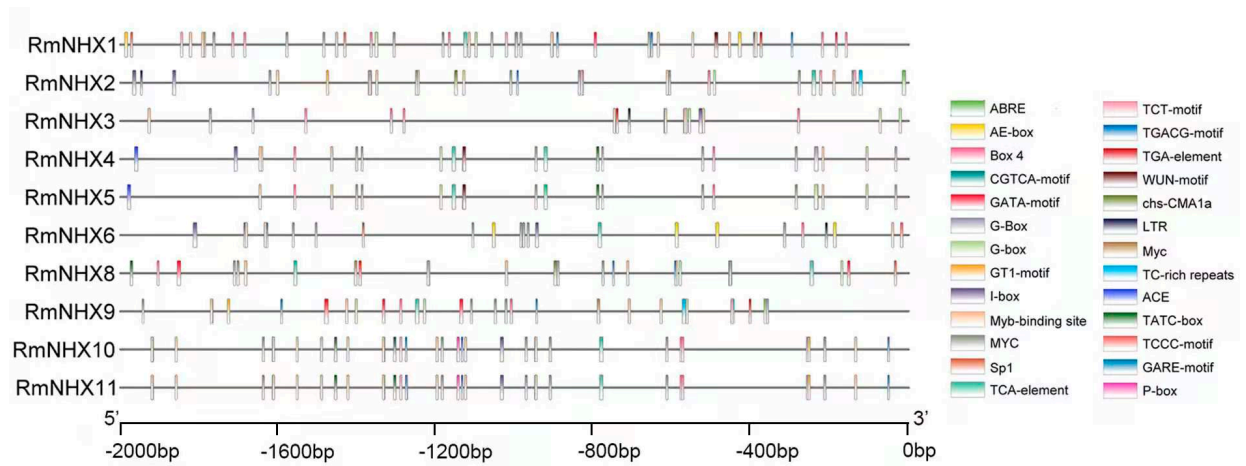

**Supplementary Figure S1.** Predicted cis-acting elements in *RmNHXs* promoters. The cis-acting elements are indicated in different colored boxes.

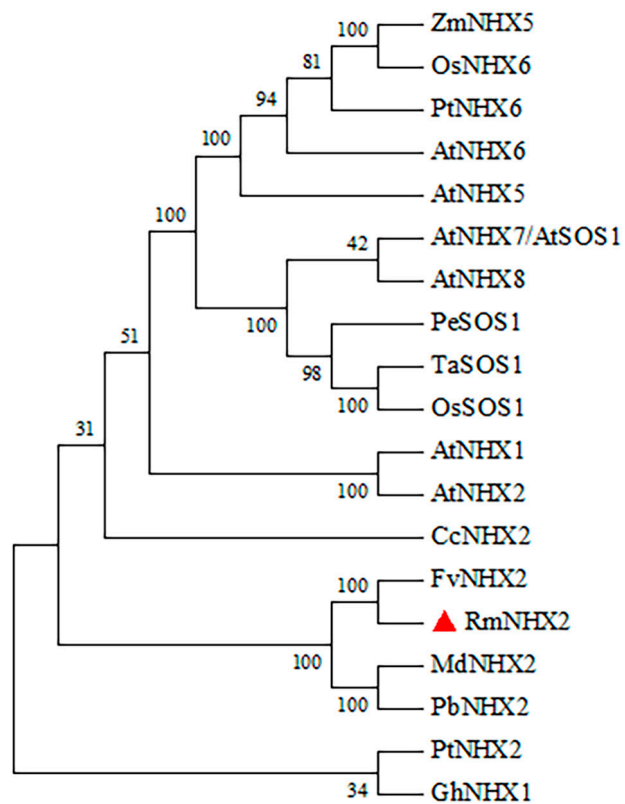

**Supplementary Figure S2.** Phylogenetic tree of *RmNHX2* protein with its homologous proteins from other plant species. MEGA 7 was used to construct the phylogenetic tree with the NJ method.

**A**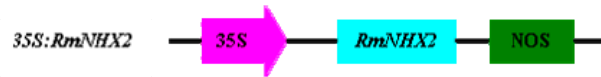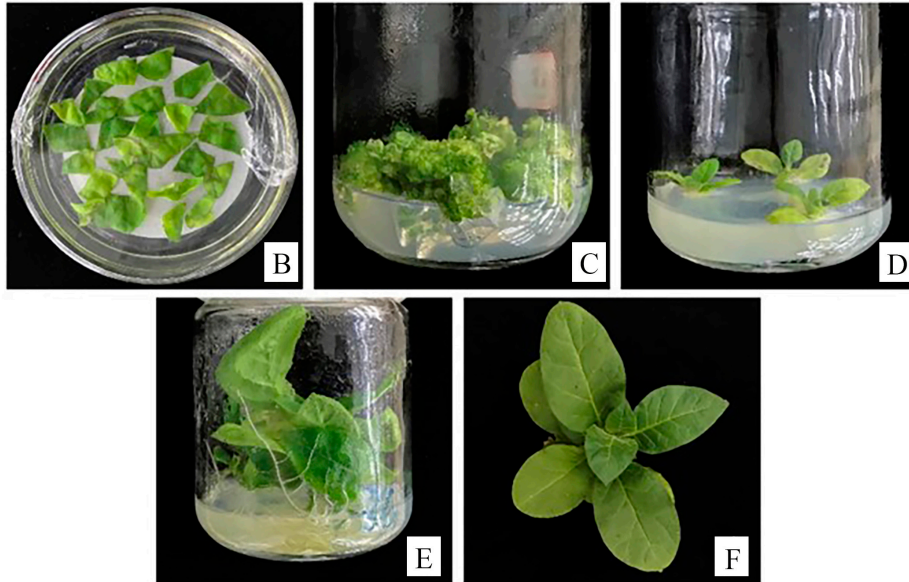**G**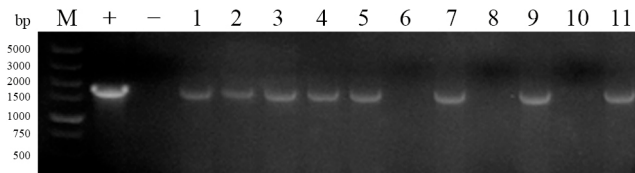**H**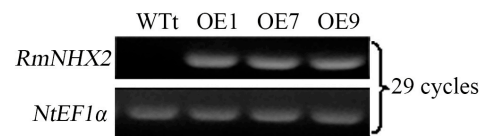

**Supplementary Figure S3.** Generation and molecular identification of transgenic tobacco plants overexpressing *RmNHX2*. (A) Schematic diagram of the *RmNHX2* overexpression construct used for tobacco transformation. 35S, cauliflower mosaic virus 35S promoter. (B–F) Transformation of *RmNHX2* into tobacco. (G) PCR confirmation of the kanamycin-resistant plants using CaMV35S- *RmNHX2* primers. M, molecular marker; +, plasmid DNA (used as a positive control); -, wild type; the numbers indicate different transgenic lines (lines 1, 7, and 9 are designated as OE1, OE7, and OE9, respectively). (H) Expression analysis of *RmNHX2* in three transgenic lines using RT-PCR. *NtEF1α* gene was used as an internal control.

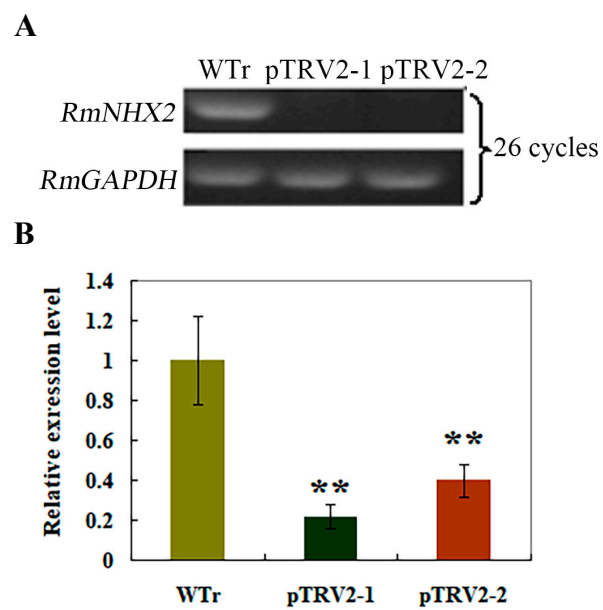

**Supplementary Figure S4.** Analysis of the transcript levels of *RmNHX2* in *Rosa multiflora* silenced plants and wild type (WTr). (A) Expression analysis of *RmNHX2* in two VIGS lines using RT-PCR. *RmGAPDH* gene was used as an internal control. (B) qRT-PCR analysis of *RmNHX2* in two VIGS lines. *RmGAPDH* gene was used as an internal control.

**Table S1.** Summary of *NHXs* genes in *Rosa multiflora*

| Gene Name | Gene ID                    | CDS length (bp) | Protein length (aa) | MW (kD) | Theoretical pI | GRAVY |
|-----------|----------------------------|-----------------|---------------------|---------|----------------|-------|
| RmNHX1    | Rmu_sc0002006.1_g000006.1  | 1629            | 542                 | 60.08   | 8.67           | 0.487 |
| RmNHX2    | Rmu_ssc0000156.1_g000005.1 | 1632            | 543                 | 60.20   | 8.90           | 0.532 |
| RmNHX3    | Rmu_sc0000515.1_g000011.1  | 1314            | 437                 | 49.54   | 9.03           | 0.467 |
| RmNHX4    | Rmu_sc0019265.1_g000004.1  | 1617            | 538                 | 59.64   | 6.56           | 0.527 |
| RmNHX5    | Rmu_sc0001085.1_g000001.1  | 807             | 268                 | 29.47   | 5.12           | 0.960 |
| RmNHX6    | Rmu_ssc0000243.1_g000029.1 | 1587            | 528                 | 57.81   | 5.13           | 0.447 |
| RmNHX7    | Rmu_sc0006865.1_g000007.1  | 2088            | 695                 | 74.68   | 5.83           | 0.529 |
| RmNHX8    | Rmu_sc0001509.1_g000010.1  | 993             | 330                 | 35.45   | 5.03           | 0.738 |
| RmNHX9    | Rmu_sc0000554.1_g000036.1  | 1731            | 576                 | 62.51   | 6.64           | 0.569 |
| RmNHX10   | Rmu_sc0021613.1_g000001.1  | 1647            | 548                 | 59.13   | 5.39           | 0.664 |
| RmNHX11   | Rmu_sc0004688.1_g000028.1  | 1590            | 529                 | 57.11   | 5.33           | 0.410 |

**Table S2. Primer sequences used in this study**

| Primer name                                        |         | Sequence(5'-3')            |
|----------------------------------------------------|---------|----------------------------|
| <b>For isolation of <i>RmNHX2</i> in wild rose</b> |         |                            |
| RmNHX2-ORF-F                                       | Forward | TGCATATTGGTTGTGTTGAAGAC    |
| RmNHX2-ORF-R                                       | Reverse | ATTTTGCTTGACTCATTGCCA      |
| <b>For vectors construction in tobacco</b>         |         |                            |
| RmNHX2-OE-F                                        | Forward | ATGGCTTCTCATTGGCCATGTT     |
| RmNHX2-OE-R                                        | Reverse | TCATTGCCATTGAGTGTTGTTC     |
| <b>For vectors construction in wild rose</b>       |         |                            |
| RmNHX2-VIGS-F                                      | Forward | AGAATCGCCTTGAAGTTTATGGG    |
| RmNHX2-VIGS-R                                      | Reverse | GCCACTGACGTTCCAGGACTATC    |
| <b>For transgenic confirmation in tobacco</b>      |         |                            |
| 35S-F                                              | Forward | ACGCACAATCCCACTATCCTTC     |
| RmNHX2-TC-R                                        | Reverse | TCATTGCCATTGAGTGTTGTTC     |
| <b>For qRT-PCR analysis</b>                        |         |                            |
| RmNHX1-qF                                          | Forward | TTCTTTTCAGCACAGTGGTGTTTGG  |
| RmNHX1-qR                                          | Reverse | ATAATGGTGGACAGTGTGAGACGGA  |
| RmNHX2-qF                                          | Forward | TCCTCTGTTGTCTCGTTGAACCTTT  |
| RmNHX2-qR                                          | Reverse | GATGCGAACTTTTCCTCCACTG     |
| RmNHX3-qF                                          | Forward | TCTCTTCACTAATGTGGTGTGCGGA  |
| RmNHX3-qR                                          | Reverse | TTGTCAAGAGCATAACGAGATTAGG  |
| RmNHX4-qF                                          | Forward | CACTTGTTATTAATCGGAAGGGCAGC |
| RmNHX4-qR                                          | Reverse | CGAACCAAATACCACTGTGCTGAAT  |
| RmNHX5-qF                                          | Forward | GATGACACTCCCTTTCTCTACAGTG  |
| RmNHX5-qR                                          | Reverse | ACCAGCTGCTATACCAAGAAGAGTG  |
| RmNHX6-qF                                          | Forward | TGGAGTAGCAAGGGCAGTTAATGTT  |
| RmNHX6-qR                                          | Reverse | CAGCATTGTACCCGTTGAACCTCCA  |
| RmNHX7-qF                                          | Forward | CCCTTCTTGTTGGAATGTCTTTGGC  |
| RmNHX7-qR                                          | Reverse | GCCAATCTCACTTAGGCTATCAGGG  |
| RmNHX8-qF                                          | Forward | GCTGTAGGTATTGGTCTTGCTTTTG  |
| RmNHX8-qR                                          | Reverse | ATCGCAGCATAAAACATTCCTAAAG  |
| RmNHX9-qF                                          | Forward | TTAAGCCGGGCCTCAAATCTTCATC  |
| RmNHX9-qR                                          | Reverse | TCAATCATCGCAACTTTCTCCTCGT  |
| RmNHX10-qF                                         | Forward | CAAGGGATTTCGGATACAACAACAAA |
| RmNHX10-qR                                         | Reverse | AAGGAGTGGTCACCAGACTAAGTGC  |
| RmNHX11-qF                                         | Forward | AAGTCGTGCCTCTAATCTCCATCTA  |
| RmNHX11-qR                                         | Reverse | TAAATCCAATCTCAACAGCACCGTC  |
| RmGAPDH -qF                                        | Forward | TGAAGGGTGGTGCCAAGAA        |
| RmGAPDH -qR                                        | Reverse | AAGGGGAGCAAGACAGTTGG       |
| NtPOD-qF                                           | Forward | CAAATGTAAGAGGAACTCAGAGG    |
| NtPOD-qR                                           | Reverse | AGCAACAACCTCCAGCTAATTGATAG |
| NtSOD-qF                                           | Forward | AGCTACATGACGCCATTTC        |

|          |         |                           |
|----------|---------|---------------------------|
| NtSOD-qR | Reverse | CCCTGTAAAGCAGCACCTTC      |
| NtCAT-qF | Forward | AGGTACCGCTCATTACACC       |
| NtCAT-qR | Reverse | AAGCAAGCTTTTGACCCAGA      |
| RmPOD-qF | Forward | GTGGAGGCTTCATGTCCTGGTGT   |
| RmPOD-qR | Reverse | TGGTGCTGGTAATTGTCTGGTTT   |
| RmSOD-qF | Forward | CATATTCACGCTCTTGGTGATACCT |
| RmSOD-qR | Reverse | CTGCCAGTCGTCAACAGAAACCT   |
| RmCAT-qF | Forward | CTTGGGTAGCATGGCTGTGA      |
| RmCAT-qR | Reverse | GGGAAGGCACACTACGTGAA      |

---
